# Supplementary material for: Automated workflows for modelling chemical fate, kinetics and toxicity
Source: PubMed Central journal article supplement (PMC5745146; doi:10.1016/j.tiv.2017.03.004), 2017-12
Supplement: mmc1.pdf [file mmc1.pdf]

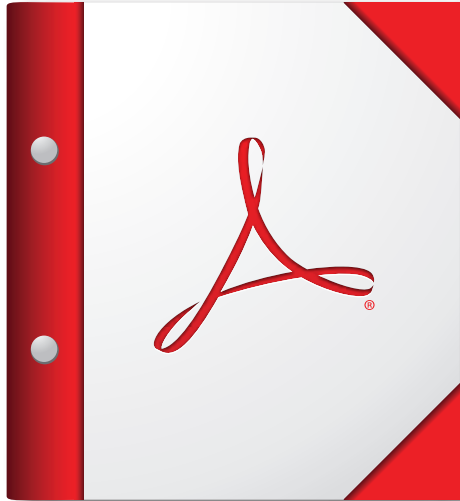

**For the best experience, open this PDF portfolio in  
Acrobat 9 or Adobe Reader 9, or later.**

[Get Adobe Reader Now!](#)
